# Supplementary material for: Effects of Hypertension, Diabetes, and Smoking on Age and Sex Prediction from Retinal Fundus Images
Source: PubMed Central journal article supplement (PMC7067849; doi:10.1038/s41598-020-61519-9), 2020-03-12
Supplement: 41598_2020_61519_MOESM1_ESM.pdf [file 41598_2020_61519_MOESM1_ESM.pdf]

# Effects of Hypertension, Diabetes, and Smoking on Age and Sex Prediction from Retinal Fundus

## Images

Yong Dae Kim, MD<sup>1,2\*</sup>; Kyoung Jin Noh, MS<sup>1\*</sup>; Seong Jun Byun, MS<sup>1\*</sup>; Sookahn Lee, PhD<sup>3</sup>; Tackeun Kim, MD<sup>4</sup>; Leonard Sunwoo, MD<sup>5</sup>; Kyong Joon Lee, PhD<sup>5</sup>; Si-Hyuck Kang, MD<sup>6</sup>; Kyu Hyung Park, MD, PhD<sup>1</sup>; Sang Jun Park, MD, MSc<sup>1</sup>

<sup>1</sup>Department of Ophthalmology, Seoul National University Bundang Hospital, Seoul National University College of Medicine, Seongnam, Republic of Korea

<sup>2</sup>Department of Ophthalmology, Kangdong Sacred Heart Hospital, Seoul, Korea

<sup>3</sup>School of Electrical Engineering, Kookmin University, Seoul, Republic of Korea

<sup>4</sup>Department of Neurosurgery, Seoul National University Bundang Hospital, Seongnam, Republic of Korea

<sup>5</sup>Department of Radiology, Seoul National University Bundang Hospital, Seongnam, Republic of Korea

<sup>6</sup>Division of Cardiology, Department of Internal Medicine, Seoul National University Bundang Hospital, Seongnam, Republic of Korea

\*These authors contributed equally to this work.

**Supplementary Fig. S1.** Box plot of the squared error values in the four test-sets: normal, hypertension, diabetes, and smoking. ANOVA demonstrated significant difference between four test sets.

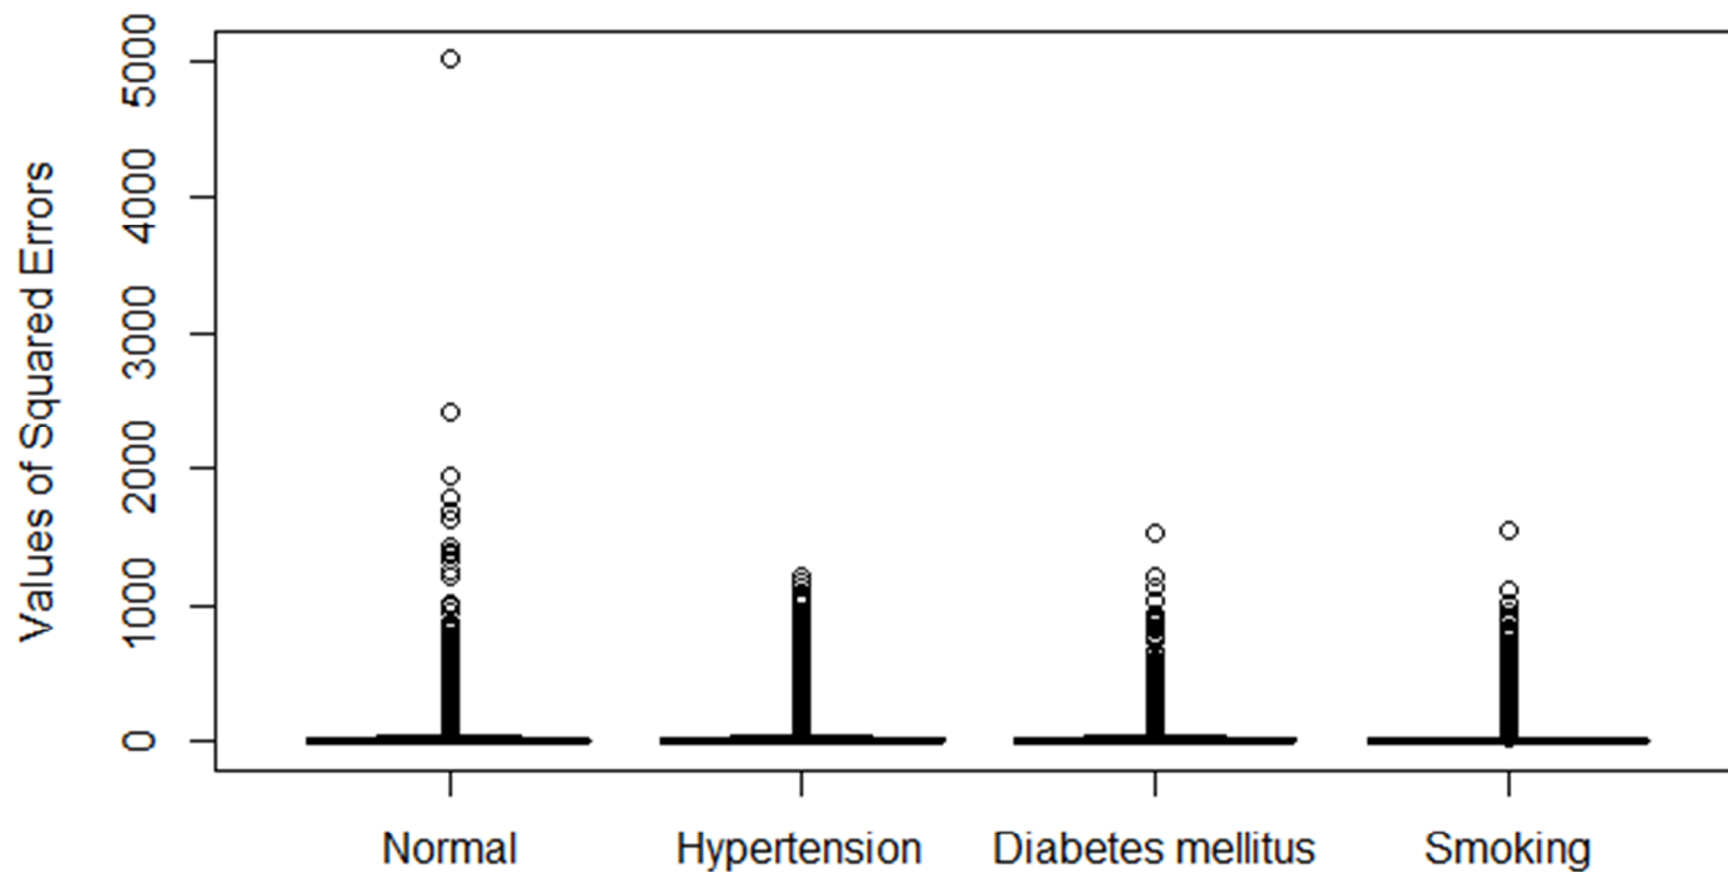

**Supplementary Table S1.** Detailed numbers of participants and their retinal fundus images from both right and left eyes according to underlying conditions.

|                                            | Participants | Images  |
|--------------------------------------------|--------------|---------|
| Normal                                     | 85,639       | 243,668 |
| Training-set                               | 84,526       | 216,866 |
| Validation-set                             | 2,397        | 2,436   |
| Test-set                                   | 20,823       | 24,366  |
| Vascular underlying conditions             |              |         |
| Hypertension                               | 12,168       | 40,569  |
| Diabetes mellitus                          | 4,545        | 14,189  |
| Smoking                                    | 30,990       | 113,510 |
| Overlap conditions                         |              |         |
| Hypertension & Diabetes mellitus           | 2,013        | 7,598   |
| Hypertension & Smoking                     | 6,500        | 23,165  |
| Diabetes mellitus & Smoking                | 2,758        | 9,112   |
| Hypertension & Diabetes mellitus & Smoking | 1,285        | 4,872   |

**Supplementary Table S2.** Number and percentage of retinal fundus images according to the age and sex of each test-set.

| Age | Normal test-set (N=24,366) |                   | Hypertension test-set (N=40,569) |                   | Diabetes mellitus test-set (N=14,189) |                  | Smoking test-set (N=113,510) |                  |
|-----|----------------------------|-------------------|----------------------------------|-------------------|---------------------------------------|------------------|------------------------------|------------------|
|     | Male (N=13,427)            | Female (N=10,939) | Male (N=27,389)                  | Female (N=13,270) | Male (N=10,509)                       | Female (N=3,680) | Male (N=106,116)             | Female (N=7,394) |
| 1   | -                          | 2 (0.02%)         | -                                | -                 | -                                     | -                | -                            | -                |
| 2   | 2 (0.01%)                  | 2 (0.02%)         | -                                | -                 | -                                     | -                | -                            | -                |
| 3   | 13 (0.10%)                 | 25 (0.23%)        | -                                | -                 | -                                     | -                | -                            | -                |
| 4   | 52 (0.39%)                 | 69 (0.63%)        | -                                | -                 | -                                     | -                | -                            | -                |
| 5   | 109 (0.81%)                | 102 (0.93%)       | -                                | -                 | -                                     | -                | -                            | -                |
| 6   | 133 (0.99%)                | 133 (1.22%)       | -                                | -                 | -                                     | -                | -                            | -                |
| 7   | 96 (0.71%)                 | 139 (1.27%)       | -                                | -                 | -                                     | -                | -                            | -                |
| 8   | 84 (0.63%)                 | 109 (1.00%)       | -                                | -                 | -                                     | -                | -                            | -                |
| 9   | 84 (0.63%)                 | 76 (0.69%)        | -                                | -                 | -                                     | -                | -                            | -                |
| 10  | 63 (0.47%)                 | 52 (0.48%)        | -                                | -                 | -                                     | -                | -                            | -                |
| 11  | 47 (0.35%)                 | 51 (0.47%)        | -                                | -                 | -                                     | -                | -                            | -                |
| 12  | 37 (0.28%)                 | 41 (0.37%)        | -                                | -                 | -                                     | -                | -                            | -                |
| 13  | 25 (0.19%)                 | 26 (0.24%)        | -                                | -                 | -                                     | -                | -                            | -                |
| 14  | 26 (0.19%)                 | 26 (0.24%)        | -                                | -                 | -                                     | -                | -                            | -                |
| 15  | 22 (0.16%)                 | 18 (0.16%)        | -                                | -                 | -                                     | -                | -                            | -                |
| 16  | 19 (0.14%)                 | 24 (0.22%)        | -                                | -                 | -                                     | -                | -                            | -                |
| 17  | 14 (0.10%)                 | 17 (0.16%)        | -                                | -                 | -                                     | -                | -                            | -                |
| 18  | 9 (0.07%)                  | 11 (0.10%)        | -                                | -                 | -                                     | -                | -                            | -                |
| 19  | 6 (0.04%)                  | 10 (0.09%)        | -                                | -                 | -                                     | -                | 8 (0.01%)                    | 2 (0.03%)        |
| 20  | 36 (0.27%)                 | 8 (0.07%)         | 4 (0.01%)                        | -                 | -                                     | -                | 44 (0.04%)                   | 10 (0.14%)       |
| 21  | 36 (0.27%)                 | 25 (0.23%)        | 2 (0.01%)                        | -                 | -                                     | 2 (0.05%)        | 61 (0.06%)                   | 10 (0.14%)       |
| 22  | 20 (0.15%)                 | 25 (0.23%)        | 6 (0.02%)                        | -                 | -                                     | 2 (0.05%)        | 72 (0.07%)                   | 22 (0.30%)       |
| 23  | 26 (0.19%)                 | 21 (0.19%)        | 4 (0.01%)                        | -                 | 2 (0.02%)                             | -                | 72 (0.07%)                   | 17 (0.23%)       |
| 24  | 23 (0.17%)                 | 28 (0.26%)        | 4 (0.01%)                        | 2 (0.02%)         | -                                     | 4 (0.11%)        | 118 (0.11%)                  | 37 (0.50%)       |
| 25  | 29 (0.22%)                 | 24 (0.22%)        | 2 (0.01%)                        | -                 | 2 (0.02%)                             | -                | 109 (0.10%)                  | 32 (0.43%)       |
| 26  | 23 (0.17%)                 | 33 (0.30%)        | 12 (0.04%)                       | 2 (0.02%)         | 2 (0.02%)                             | -                | 150 (0.14%)                  | 49 (0.66%)       |
| 27  | 40 (0.30%)                 | 41 (0.37%)        | 10 (0.04%)                       | -                 | 2 (0.02%)                             | -                | 201 (0.19%)                  | 49 (0.66%)       |
| 28  | 41 (0.31%)                 | 46 (0.42%)        | 10 (0.04%)                       | 4 (0.03%)         | -                                     | 2 (0.05%)        | 240 (0.23%)                  | 78 (1.05%)       |
| 29  | 50 (0.37%)                 | 66 (0.60%)        | 20 (0.07%)                       | 2 (0.02%)         | -                                     | 4 (0.11%)        | 320 (0.30%)                  | 99 (1.34%)       |
| 30  | 87 (0.65%)                 | 62 (0.57%)        | 32 (0.12%)                       | 6 (0.05%)         | 4 (0.04%)                             | -                | 489 (0.46%)                  | 120 (1.62%)      |
| 31  | 84 (0.63%)                 | 84 (0.77%)        | 26 (0.09%)                       | 10 (0.08%)        | 6 (0.06%)                             | 4 (0.11%)        | 495 (0.47%)                  | 114 (1.54%)      |
| 32  | 92 (0.69%)                 | 94 (0.86%)        | 28 (0.10%)                       | -                 | 4 (0.04%)                             | 10 (0.27%)       | 583 (0.55%)                  | 140 (1.89%)      |
| 33  | 98 (0.73%)                 | 94 (0.86%)        | 50 (0.18%)                       | 4 (0.03%)         | 16 (0.15%)                            | 10 (0.27%)       | 677 (0.64%)                  | 129 (1.74%)      |
| 34  | 125 (0.93%)                | 115 (1.05%)       | 50 (0.18%)                       | 10 (0.08%)        | 12 (0.11%)                            | 10 (0.27%)       | 830 (0.78%)                  | 166 (2.25%)      |
| 35  | 142 (1.06%)                | 125 (1.14%)       | 78 (0.28%)                       | 4 (0.03%)         | 12 (0.11%)                            | 10 (0.27%)       | 995 (0.94%)                  | 182 (2.46%)      |
| 36  | 177 (1.32%)                | 158 (1.44%)       | 84 (0.31%)                       | 11 (0.08%)        | 18 (0.17%)                            | 22 (0.60%)       | 1,274 (1.20%)                | 233 (3.15%)      |
| 37  | 227 (1.69%)                | 185 (1.69%)       | 127 (0.46%)                      | 16 (0.12%)        | 46 (0.44%)                            | 16 (0.43%)       | 1,641 (1.55%)                | 258 (3.49%)      |
| 38  | 215 (1.60%)                | 205 (1.87%)       | 155 (0.57%)                      | 18 (0.14%)        | 56 (0.53%)                            | 9 (0.24%)        | 1,843 (1.74%)                | 279 (3.77%)      |
| 39  | 264 (1.97%)                | 245 (2.24%)       | 189 (0.69%)                      | 22 (0.17%)        | 56 (0.53%)                            | 23 (0.62%)       | 2,007 (1.89%)                | 301 (4.07%)      |

|    |             |             |               |             |             |             |               |             |
|----|-------------|-------------|---------------|-------------|-------------|-------------|---------------|-------------|
| 40 | 299 (2.23%) | 289 (2.64%) | 251 (0.92%)   | 48 (0.36%)  | 103 (0.98%) | 26 (0.71%)  | 2,513 (2.37%) | 300 (4.06%) |
| 41 | 419 (3.12%) | 277 (2.53%) | 346 (1.26%)   | 48 (0.36%)  | 136 (1.29%) | 26 (0.71%)  | 3,127 (2.95%) | 258 (3.49%) |
| 42 | 414 (3.08%) | 293 (2.68%) | 407 (1.49%)   | 65 (0.49%)  | 157 (1.49%) | 28 (0.76%)  | 3,373 (3.18%) | 285 (3.85%) |
| 43 | 484 (3.60%) | 295 (2.70%) | 519 (1.89%)   | 94 (0.71%)  | 172 (1.64%) | 43 (1.17%)  | 3,848 (3.63%) | 308 (4.17%) |
| 44 | 465 (3.46%) | 310 (2.83%) | 556 (2.03%)   | 108 (0.81%) | 166 (1.58%) | 35 (0.95%)  | 3,713 (3.50%) | 259 (3.50%) |
| 45 | 456 (3.40%) | 295 (2.70%) | 604 (2.21%)   | 114 (0.86%) | 200 (1.90%) | 29 (0.79%)  | 4,014 (3.78%) | 234 (3.16%) |
| 46 | 472 (3.52%) | 320 (2.93%) | 693 (2.53%)   | 104 (0.78%) | 262 (2.49%) | 36 (0.98%)  | 4,182 (3.94%) | 255 (3.45%) |
| 47 | 484 (3.60%) | 315 (2.88%) | 711 (2.60%)   | 173 (1.30%) | 302 (2.87%) | 50 (1.36%)  | 4,215 (3.97%) | 256 (3.46%) |
| 48 | 491 (3.66%) | 319 (2.92%) | 824 (3.01%)   | 181 (1.36%) | 357 (3.40%) | 44 (1.20%)  | 4,276 (4.03%) | 192 (2.60%) |
| 49 | 489 (3.64%) | 301 (2.75%) | 939 (3.43%)   | 222 (1.67%) | 384 (3.65%) | 48 (1.30%)  | 4,426 (4.17%) | 231 (3.12%) |
| 50 | 465 (3.46%) | 317 (2.90%) | 931 (3.40%)   | 320 (2.41%) | 411 (3.91%) | 61 (1.66%)  | 4,221 (3.98%) | 242 (3.27%) |
| 51 | 517 (3.85%) | 339 (3.10%) | 1,200 (4.38%) | 355 (2.68%) | 456 (4.34%) | 63 (1.71%)  | 4,970 (4.68%) | 205 (2.77%) |
| 52 | 435 (3.24%) | 343 (3.14%) | 1,058 (3.86%) | 343 (2.58%) | 396 (3.77%) | 82 (2.23%)  | 4,085 (3.85%) | 183 (2.47%) |
| 53 | 413 (3.08%) | 316 (2.89%) | 1,124 (4.10%) | 428 (3.23%) | 427 (4.06%) | 89 (2.42%)  | 4,107 (3.87%) | 213 (2.88%) |
| 54 | 408 (3.04%) | 319 (2.92%) | 1,165 (4.25%) | 510 (3.84%) | 460 (4.38%) | 90 (2.45%)  | 3,986 (3.76%) | 198 (2.68%) |
| 55 | 413 (3.08%) | 262 (2.40%) | 1,283 (4.68%) | 534 (4.02%) | 450 (4.28%) | 102 (2.77%) | 3,893 (3.67%) | 165 (2.23%) |
| 56 | 339 (2.52%) | 245 (2.24%) | 1,104 (4.03%) | 516 (3.89%) | 447 (4.25%) | 97 (2.64%)  | 3,380 (3.19%) | 156 (2.11%) |
| 57 | 313 (2.33%) | 230 (2.10%) | 1,112 (4.06%) | 494 (3.72%) | 450 (4.28%) | 108 (2.93%) | 3,153 (2.97%) | 140 (1.89%) |
| 58 | 316 (2.35%) | 242 (2.21%) | 1,114 (4.07%) | 467 (3.52%) | 464 (4.42%) | 149 (4.05%) | 2,934 (2.76%) | 136 (1.84%) |
| 59 | 247 (1.84%) | 232 (2.12%) | 1,058 (3.86%) | 614 (4.63%) | 374 (3.56%) | 171 (4.65%) | 2,464 (2.32%) | 110 (1.49%) |
| 60 | 228 (1.70%) | 203 (1.86%) | 947 (3.46%)   | 638 (4.81%) | 368 (3.50%) | 206 (5.60%) | 2,195 (2.07%) | 105 (1.42%) |
| 61 | 214 (1.59%) | 192 (1.76%) | 934 (3.41%)   | 591 (4.45%) | 352 (3.35%) | 110 (2.99%) | 2,044 (1.93%) | 65 (0.88%)  |
| 62 | 191 (1.42%) | 182 (1.66%) | 718 (2.62%)   | 523 (3.94%) | 302 (2.87%) | 159 (4.32%) | 1,732 (1.63%) | 88 (1.19%)  |
| 63 | 174 (1.30%) | 185 (1.69%) | 737 (2.69%)   | 554 (4.17%) | 279 (2.65%) | 158 (4.29%) | 1,610 (1.52%) | 71 (0.96%)  |
| 64 | 148 (1.10%) | 165 (1.51%) | 648 (2.37%)   | 538 (4.05%) | 308 (2.93%) | 179 (4.86%) | 1,503 (1.42%) | 55 (0.74%)  |
| 65 | 176 (1.31%) | 142 (1.30%) | 675 (2.46%)   | 491 (3.70%) | 266 (2.53%) | 149 (4.05%) | 1,415 (1.33%) | 52 (0.70%)  |
| 66 | 155 (1.15%) | 145 (1.33%) | 625 (2.28%)   | 485 (3.65%) | 246 (2.34%) | 146 (3.97%) | 1,247 (1.18%) | 55 (0.74%)  |
| 67 | 118 (0.88%) | 151 (1.38%) | 589 (2.15%)   | 395 (2.98%) | 214 (2.04%) | 130 (3.53%) | 1,061 (1.00%) | 34 (0.46%)  |
| 68 | 151 (1.12%) | 136 (1.24%) | 530 (1.94%)   | 457 (3.44%) | 189 (1.80%) | 137 (3.72%) | 1,030 (0.97%) | 30 (0.41%)  |
| 69 | 112 (0.83%) | 105 (0.96%) | 509 (1.86%)   | 382 (2.88%) | 156 (1.48%) | 123 (3.34%) | 942 (0.89%)   | 29 (0.39%)  |
| 70 | 114 (0.85%) | 105 (0.96%) | 439 (1.60%)   | 406 (3.06%) | 140 (1.33%) | 126 (3.42%) | 786 (0.74%)   | 38 (0.51%)  |
| 71 | 84 (0.63%)  | 108 (0.99%) | 338 (1.23%)   | 312 (2.35%) | 157 (1.49%) | 75 (2.04%)  | 642 (0.60%)   | 25 (0.34%)  |
| 72 | 80 (0.60%)  | 68 (0.62%)  | 370 (1.35%)   | 347 (2.61%) | 155 (1.47%) | 103 (2.80%) | 589 (0.56%)   | 18 (0.24%)  |
| 73 | 84 (0.63%)  | 74 (0.68%)  | 286 (1.04%)   | 288 (2.17%) | 99 (0.94%)  | 78 (2.12%)  | 495 (0.47%)   | 6 (0.08%)   |
| 74 | 76 (0.57%)  | 80 (0.73%)  | 232 (0.85%)   | 208 (1.57%) | 79 (0.75%)  | 61 (1.66%)  | 396 (0.37%)   | 19 (0.26%)  |
| 75 | 43 (0.32%)  | 58 (0.53%)  | 183 (0.67%)   | 201 (1.51%) | 79 (0.75%)  | 43 (1.17%)  | 280 (0.26%)   | 14 (0.19%)  |
| 76 | 49 (0.36%)  | 63 (0.58%)  | 174 (0.64%)   | 151 (1.14%) | 67 (0.64%)  | 53 (1.44%)  | 260 (0.25%)   | 8 (0.11%)   |
| 77 | 38 (0.28%)  | 68 (0.62%)  | 155 (0.57%)   | 130 (0.98%) | 69 (0.66%)  | 37 (1.01%)  | 215 (0.20%)   | 6 (0.08%)   |
| 78 | 33 (0.25%)  | 56 (0.51%)  | 100 (0.37%)   | 81 (0.61%)  | 29 (0.28%)  | 28 (0.76%)  | 151 (0.14%)   | 8 (0.11%)   |
| 79 | 31 (0.23%)  | 35 (0.32%)  | 85 (0.31%)    | 70 (0.53%)  | 29 (0.28%)  | 28 (0.76%)  | 121 (0.11%)   | 6 (0.08%)   |
| 80 | 19 (0.14%)  | 22 (0.20%)  | 42 (0.15%)    | 58 (0.44%)  | 28 (0.27%)  | 8 (0.22%)   | 74 (0.07%)    | 7 (0.09%)   |
| 81 | 20 (0.15%)  | 23 (0.21%)  | 66 (0.24%)    | 40 (0.30%)  | 35 (0.33%)  | 17 (0.46%)  | 82 (0.08%)    | -           |
| 82 | 8 (0.06%)   | 23 (0.21%)  | 35 (0.13%)    | 24 (0.18%)  | 20 (0.19%)  | 13 (0.35%)  | 45 (0.04%)    | -           |

|    |            |            |            |            |           |           |            |           |
|----|------------|------------|------------|------------|-----------|-----------|------------|-----------|
| 83 | 18 (0.13%) | 21 (0.19%) | 14 (0.05%) | 25 (0.19%) | 4 (0.04%) | 6 (0.16%) | 34 (0.03%) | 2 (0.03%) |
| 84 | 10 (0.07%) | 10 (0.09%) | 16 (0.06%) | 10 (0.08%) | 7 (0.07%) | -         | 20 (0.02%) | -         |
| 85 | 13 (0.10%) | 17 (0.16%) | 21 (0.08%) | 9 (0.07%)  | 4 (0.04%) | -         | 22 (0.02%) | -         |
| 86 | 10 (0.07%) | 2 (0.02%)  | 14 (0.05%) | -          | 6 (0.06%) | -         | 5 (0.00%)  | -         |
| 87 | 3 (0.02%)  | 6 (0.05%)  | 7 (0.03%)  | 7 (0.05%)  | 4 (0.04%) | 2 (0.05%) | 11 (0.01%) | -         |
| 88 | 4 (0.03%)  | 8 (0.07%)  | 4 (0.01%)  | -          | 4 (0.04%) | -         | -          | -         |
| 89 | 1 (0.01%)  | 4 (0.04%)  | 2 (0.01%)  | -          | -         | -         | -          | -         |
| 90 | 3 (0.02%)  | 4 (0.04%)  | -          | -          | -         | -         | -          | -         |
| 91 | 2 (0.01%)  | 1 (0.01%)  | 2 (0.01%)  | -          | 2 (0.02%) | -         | -          | -         |
| 92 | 1 (0.01%)  | -          | -          | -          | -         | -         | -          | -         |
| 93 | 1 (0.01%)  | -          | -          | -          | -         | -         | -          | -         |
| 94 | -          | -          | -          | -          | -         | -         | -          | -         |
| 95 | -          | -          | -          | -          | -         | -         | -          | -         |
| 96 | -          | 1 (0.01%)  | -          | -          | -         | -         | -          | -         |

**Supplementary Table S3.** Statistical Significance of squared error values ( $[\text{predicted age}-\text{chronologic age}]^2$ ) between test-sets ( $P < 0.05$ ).

| Test-set          | Normal | Hypertension | Diabetes mellitus | Smoking |
|-------------------|--------|--------------|-------------------|---------|
| Normal            |        | Yes          | Yes               | Yes     |
| Hypertension      | Yes    |              | Yes               | Yes     |
| Diabetes mellitus | Yes    | Yes          |                   | Yes     |
| Smoking           | Yes    | Yes          | Yes               |         |

Yes = statistical significance between groups (ANOVA, Tukey's post hoc test,  $P < 0.05$ ).
